# Supplementary material
Source: PubMed Central journal article supplement (PMC4380877)

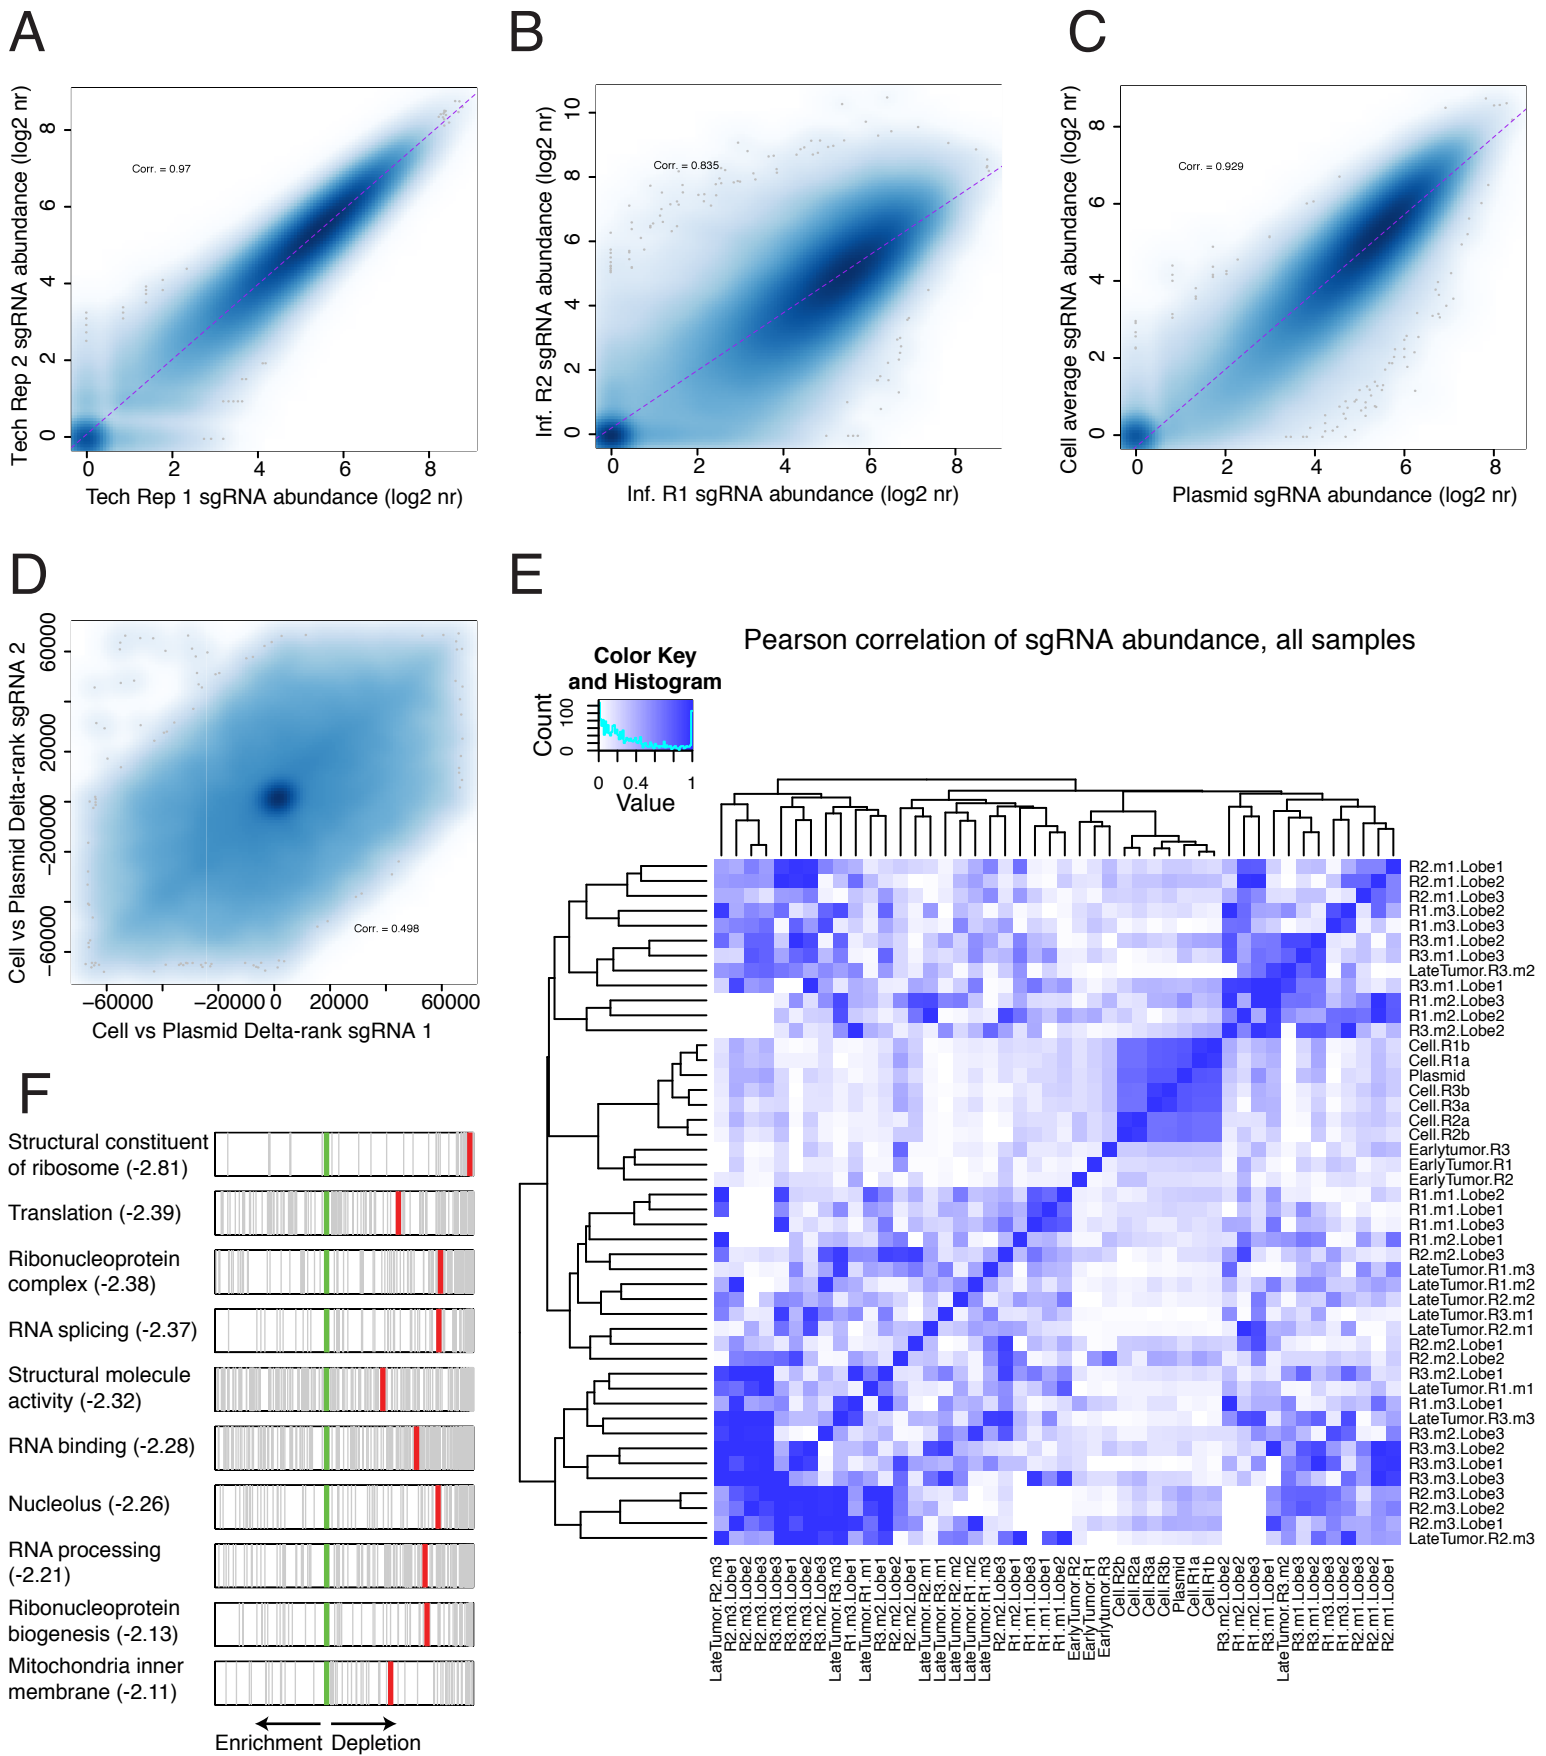

Figure S2

Supplement: NIHMS666944-supplement-3.pdf [file NIHMS666944-supplement-3.pdf]

A

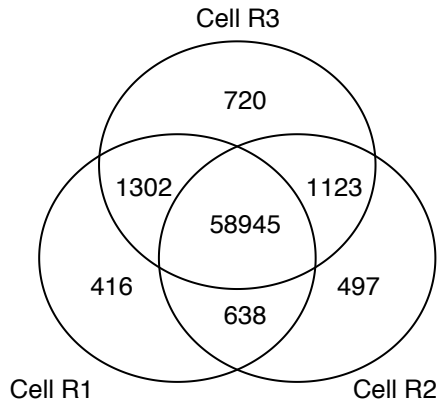

B

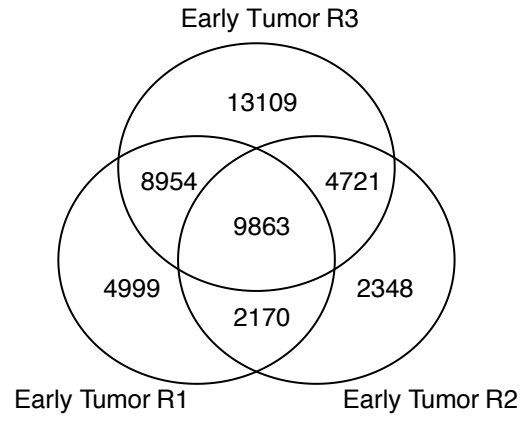

C

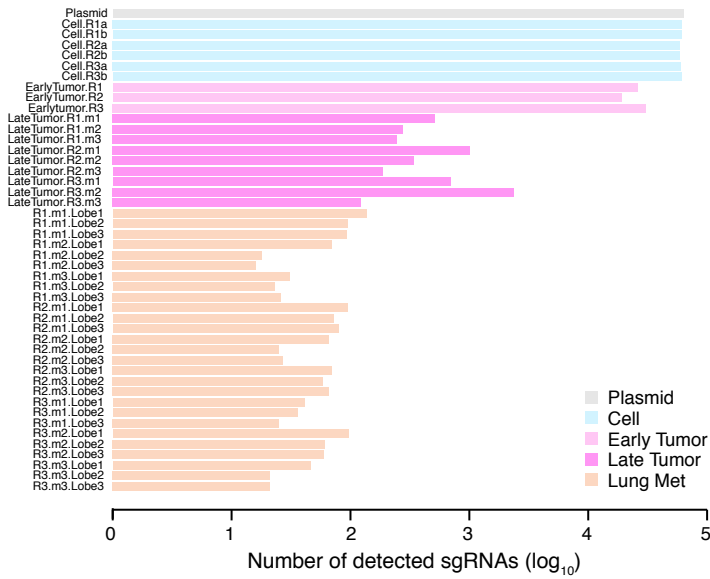

D

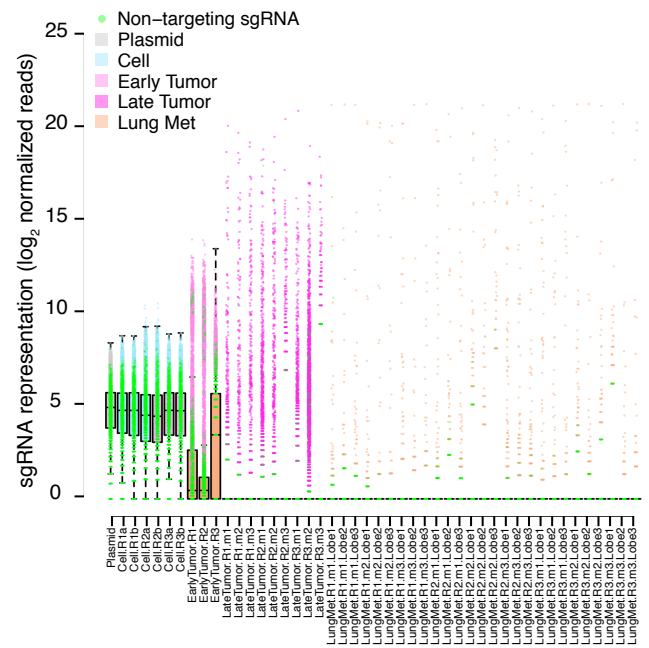

E

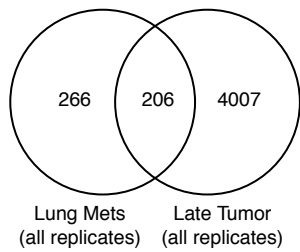

F

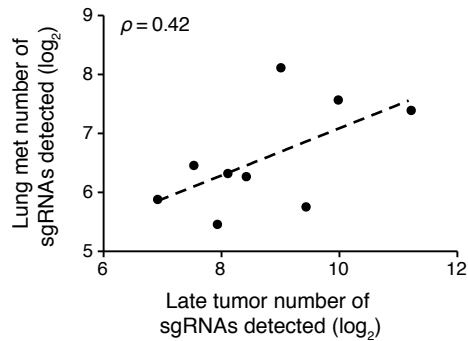

G

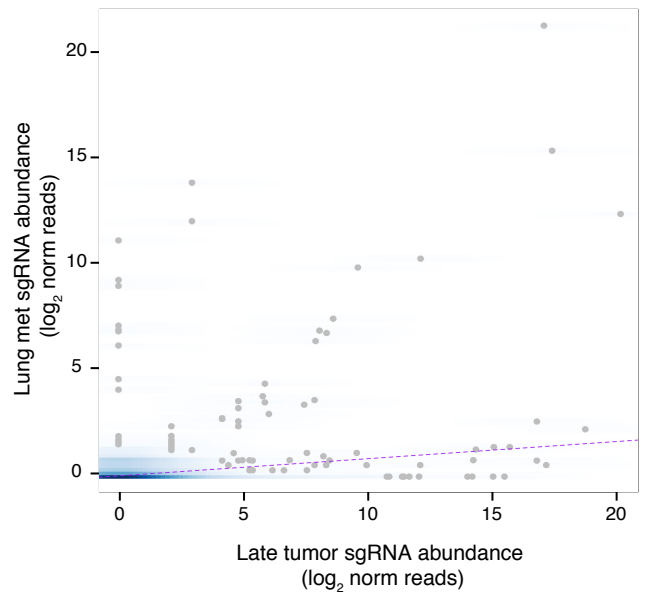

Figure S3

Supplement: NIHMS666944-supplement-4.pdf [file NIHMS666944-supplement-4.pdf]

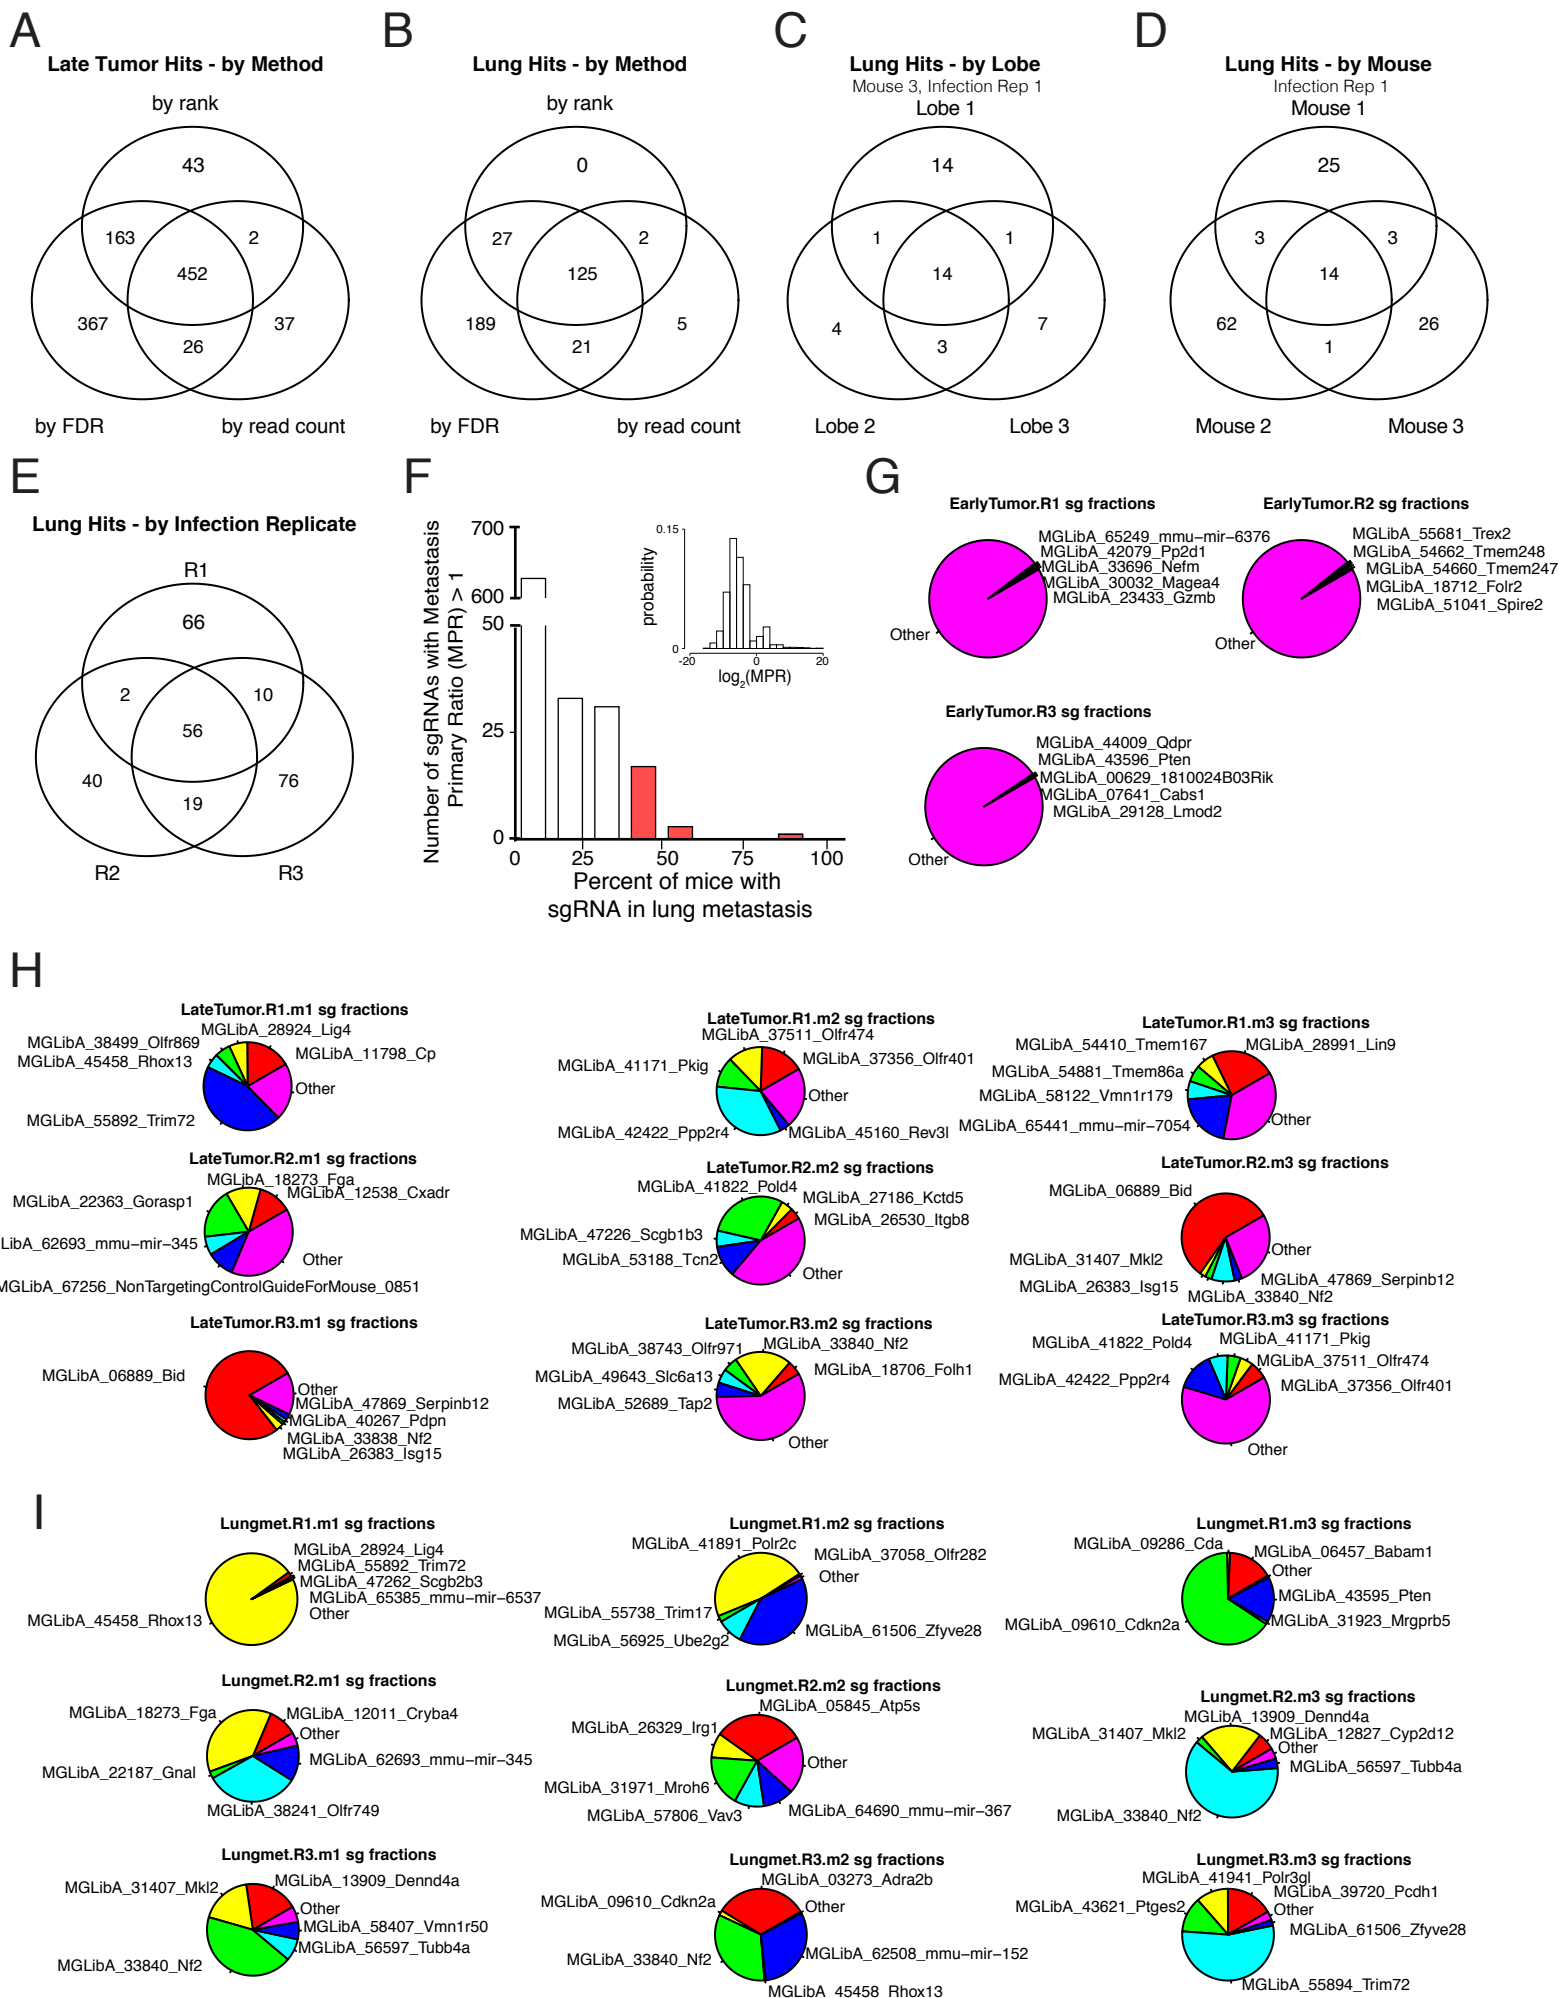

Figure S4

Supplement: NIHMS666944-supplement-5.pdf [file NIHMS666944-supplement-5.pdf]

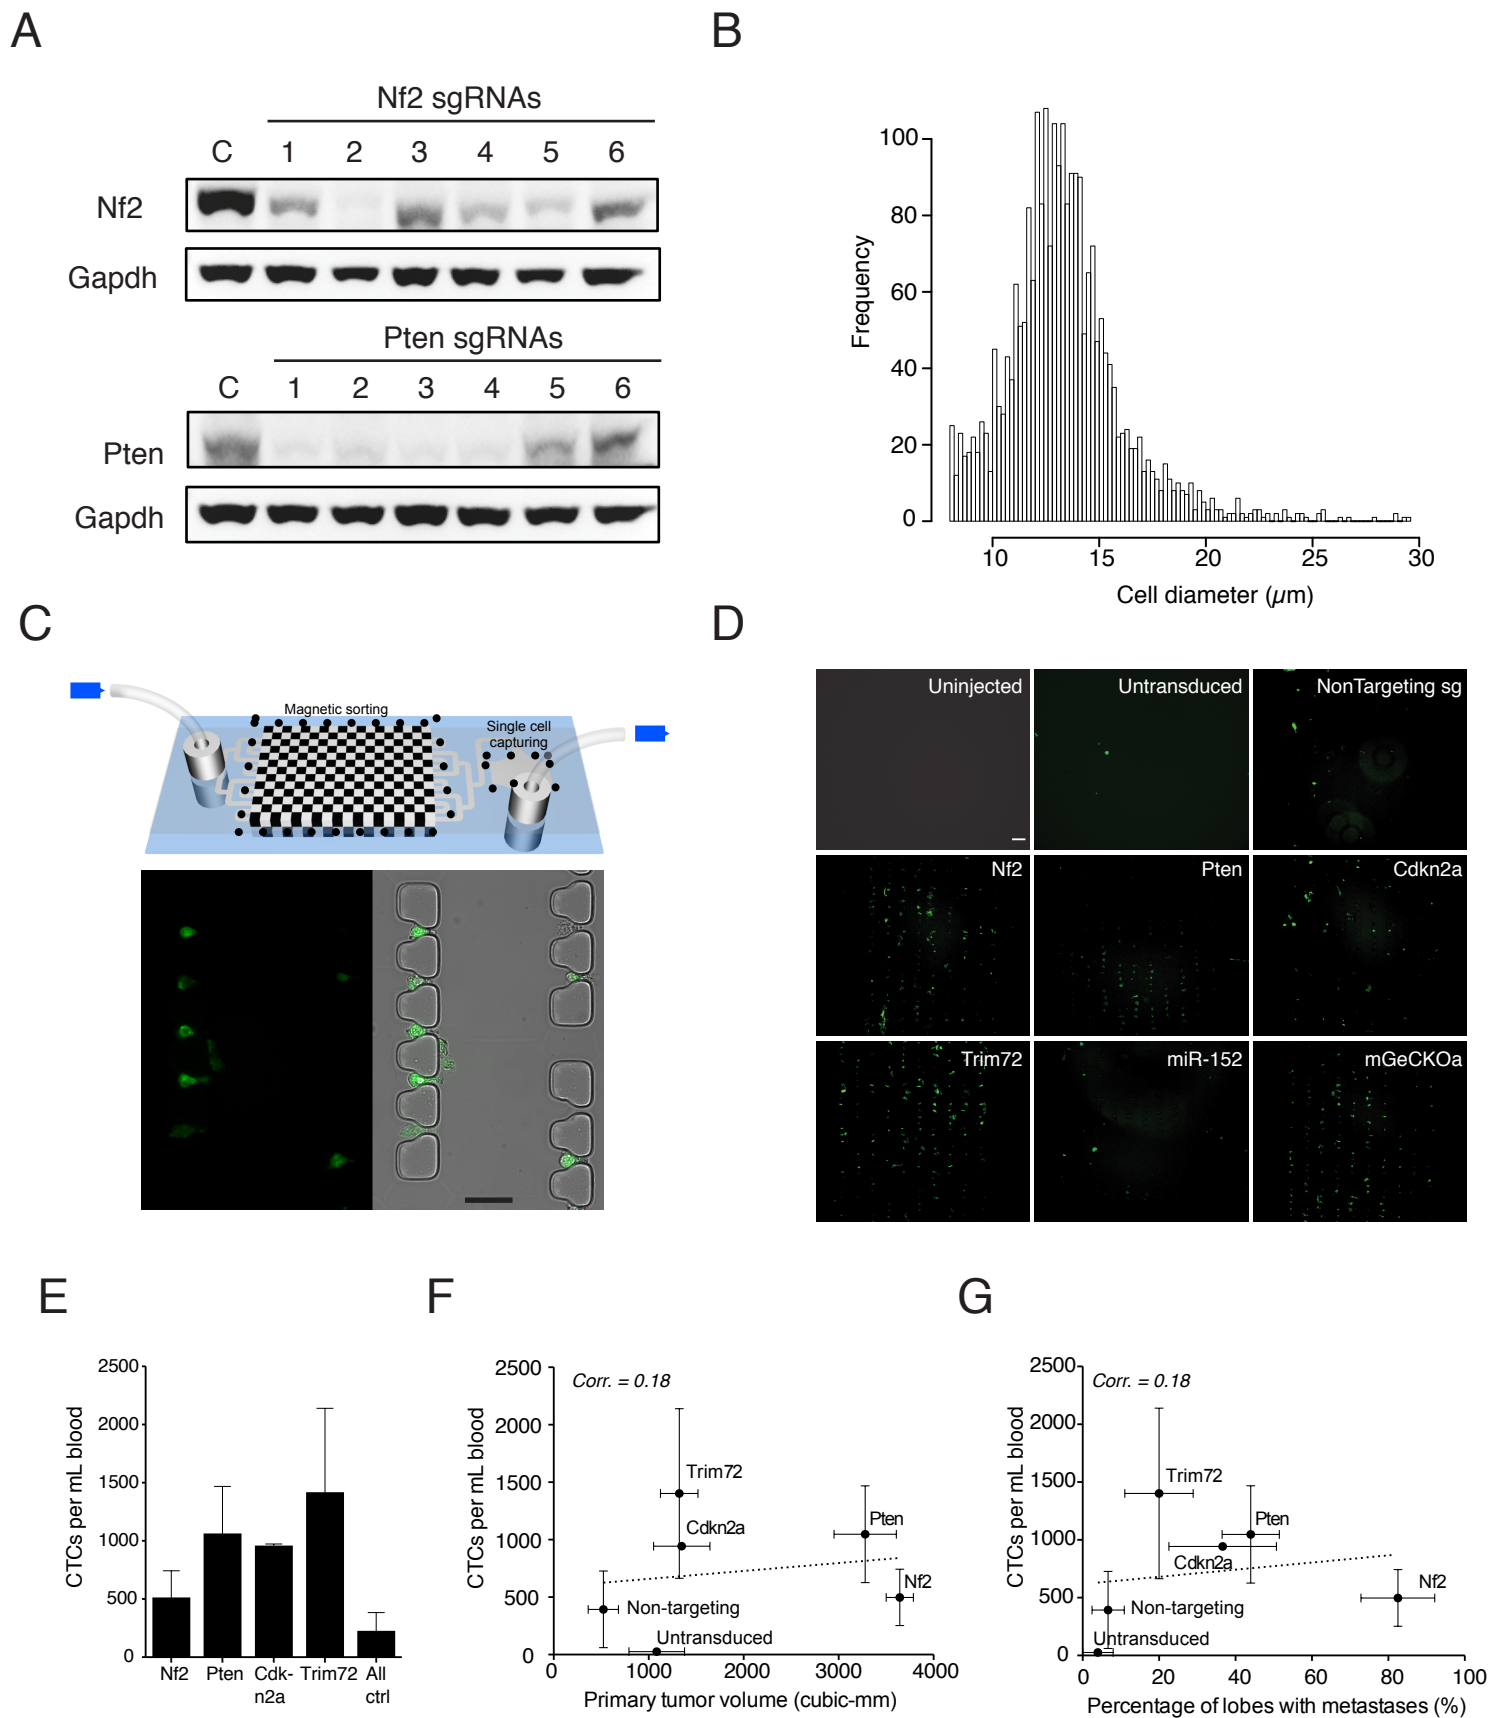

Figure S6

Supplement: NIHMS666944-supplement-7.pdf [file NIHMS666944-supplement-7.pdf]

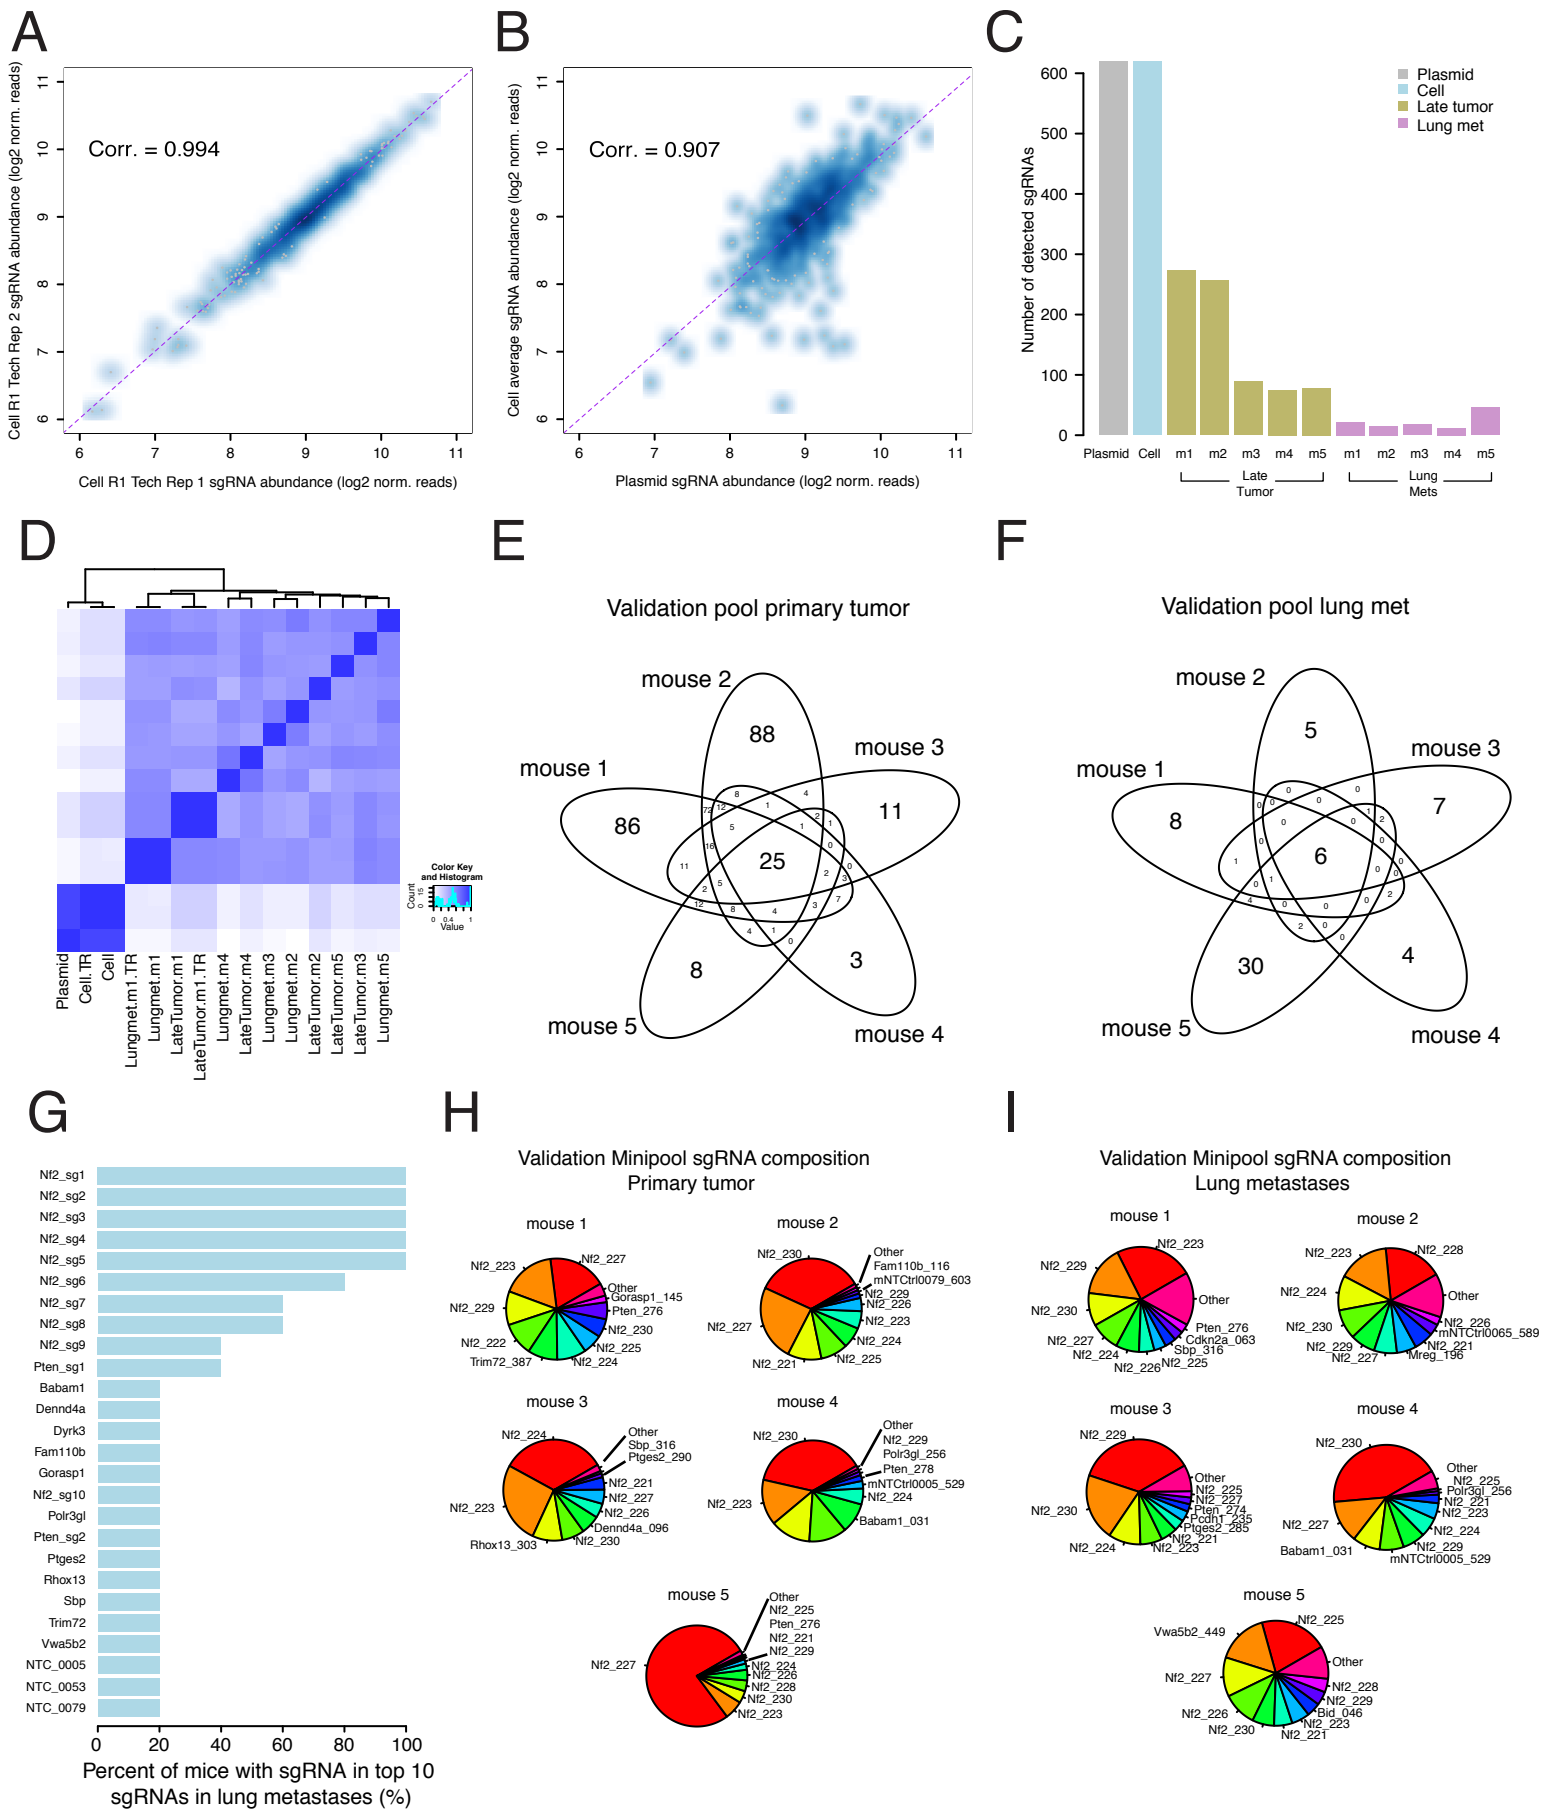

Figure S7

Supplement: NIHMS666944-supplement-8.pdf [file NIHMS666944-supplement-8.pdf]
